# Supplementary material
Source: Springer Nature journal article supplement (https://www.springermedizin.de/resource/supplementary/13063_2009_325_MOESM1_ESM.pdf/9617986)
Supplement: MOESM1 [file 9617986]

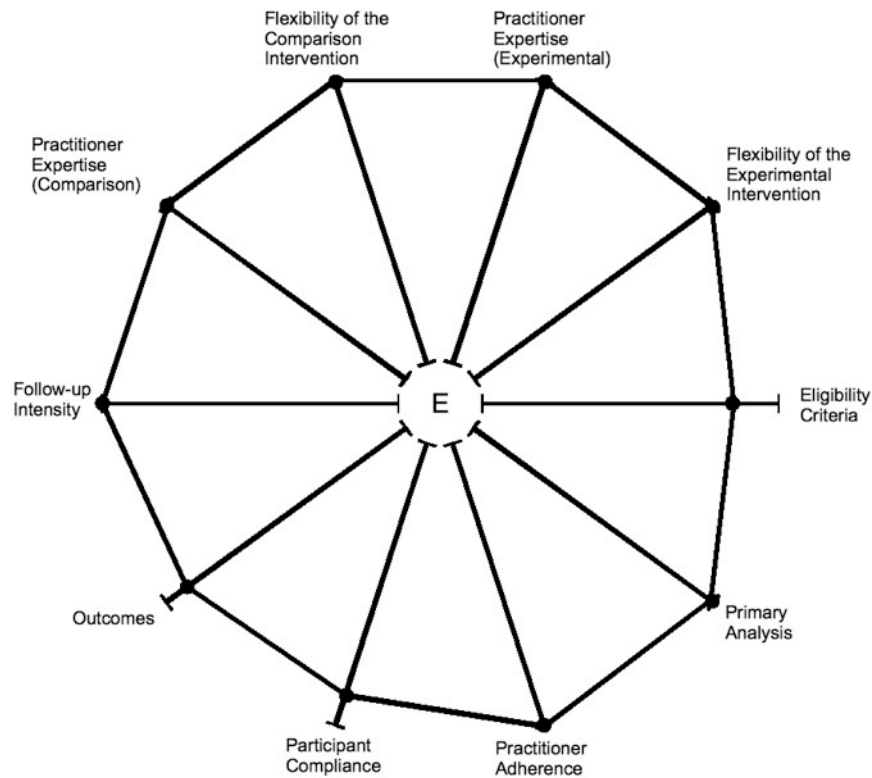

PRECIS summary of a randomised controlled trial of self-supervised and directly observed treatment of tuberculosis (DOT)<sup>35</sup>

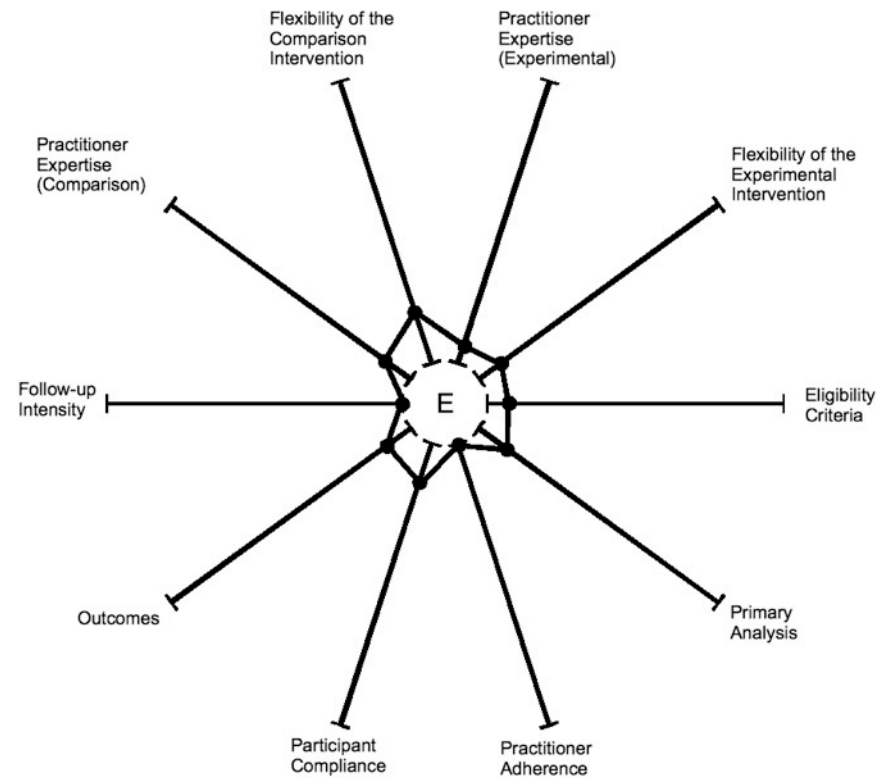

PRECIS summary of the North American Symptomatic Carotid Endarterectomy Trial (NASCET) of carotid endarterectomy for symptomatic patients with high-grade carotid stenosis<sup>36</sup>.
